# Supplementary material
Source: MDPI journal article supplement (https://www.mdpi.com/2076-3298/5/2/30)
Supplement: s1 [file s1]

## Sheet: Feuil1
	Table S1. Relative abundances of the dominant taxa (at least 5% in a least one sample) observed in the 19 samples.
		MBC	VR	CC1	CC2	CC3	JC1	JC2	JC3	JC4	JC5	JC6	JC7	JC8	JC9	FBC	NC1	NC2	NC3	CCC
ABUL	Amphora sp. [A. cf. bullatoides Hohn & Hellerman 1963]	0	0	0	0	0	0.3	0	0	0.5	0	0.5	0	0	0	0	7.4	0	1	2.2
ADMI	Achnanthidium minutissimum (Kützing) Czarnecki in Czarnecki & Edlund 1995 Complex	34.5	54.8	43	57	34.3	61.6	6.8	7.1	6.7	13.5	38.1	63.7	0.7	0	34.9	3.7	33.5	64.5	7.7
AVEN	Amphora veneta Kützing 1844	0	0	0	0.2	0	0	0.2	0	0	0	0	0	21.5	9.7	0	0	0	0	0
BVIT	Brachysira vitrea (Grunow) Ross in Hartley	0.7	0.2	0.8	4.4	0	7.4	0	0	0.5	0	2	0	0.2	0.3	29.1	84.3	59.2	8.8	36.5
CBAC	Caloneis bacillum (Grunow) Cleve 1894 sensu lato	10.4	0	0	0	6.3	0	10	1.2	4.4	0	0.2	0	2.2	0	0	0	0	0	0
DITE	Diatoma tenuis Agardh 1812	0	0	5.3	7.6	0.2	1	0.2	0.5	0.5	0	0	0	0	0.3	0	0	0	0	0
ENCM	Encyonopsis microcephala (Grunow) Krammer 1997	0	0	2.3	2.2	0	16.9	0	0	0	0	0	0	0	0	0	0	0	0	0
EOLI	Eolimna spp.	0	0.5	0	0	13	0	0.5	0.5	0	6.1	2.5	4.1	1.2	10.2	0	0	0	0	1.2
EOMI	Eolimna minima (Grunow) Lange-Bertalot 1998	1.4	0	1	0.5	6	0	3.6	2.5	2.5	5.4	3.5	1	0.7	13.5	0	0	0	2.5	0.7
EOMIF2	Eolimna minima (Grunow) Lange-Bertalot 1998 form 2 *	2.1	0	0	0	17.9	0	0	1.7	1.7	10.5	2.2	15.6	0.7	2.5	0	0	0	4.3	0
ESBM	Eolimna subminuscula (Manguin) Moser, Lange-Bertalot & Metzeltin 1998	0	0	0	0	0	0	0	0.2	0	0	0	0	55.7	20.1	0	0	0	0	0
ESLE	Encyonema silesiacum (Bleisch in Rabenhorst) Mann in Round & al. 1990	2.4	1.2	0.8	0.7	0.7	0	0.5	2.2	2.2	0	1	0	0	0	10.1	0	0.5	0	0.5
FCAPF5	Fragilaria capucina Desmazières 1825 form 5 *	0.2	0.7	8.9	4.2	0.2	0.3	0	0	0	0	0.5	0	0	0	3.8	0	3.9	0	0
GOMP	Gomphonema spp.	0	0.7	0	0	0.5	0	0	1	0.5	0	0	0.5	0	12	0.5	0	0	0	0
HCAP	Hippodonta capitata (Ehrenberg) Lange-Bertalot & al. 1996	0.5	0	0	0	0	0	1.9	7.1	5.2	0	11.9	0	0.7	0	0	0	0	0	0
NAMP	Nitzschia amphibia Grunow 1862	0.5	0.7	0	0	0	7.2	0	0.7	0.7	0	0	0	0.5	0	0	0	0	0	0
NCTO	Navicula cryptotenelloides Lange-Bertalot 1993	0	0	0	0	0	0	0	0	0	0	0	0	5.2	0	0	0	0	0	0.2
NGER	Navicula germainii Wallace 1960	2.4	0	0	0	0	0	0	0.2	13.8	0	0.5	0	0	0	0	0	0	0	0
NGRE	Navicula gregaria Donkin 1861	2.1	0.2	1	1	0	0	11.4	17.9	4.4	0	1	0	0	0	0	0	0	0	0
NLEN	Navicula lenzii Hustedt in Schmidt & al. 1936	0	0.2	0	0	0	0	0	0	7.9	0	0	0	0	0	0	0	0	0	0
NMIC	Nitzschia microcephala Grunow 1878	0	0	0	2	7	0	0	0	1	0	16.6	0.5	0	0	0	0	0	18.5	2
NPAD	Nitzschia palea var. debilis (Kützing) Grunow in Cleve & Grunow 1880	3.1	5.5	1.5	0.7	0	0.5	0.2	3.7	2	6.7	0.7	1	0	0	1.5	0	0	0	1.7
NPAD2	Nitzschia palea var. debilis (Kützing) Grunow in Cleve & Grunow 1881 form 2 **	0	0	0	0	0	0	0	0	0	0	0	0	6.4	24.9	0	0	0	0	0
NPAL	Nitzschia palea (Kützing) W.Smith 1856	0.9	1.9	0	0	0	0	0.5	1.7	2.5	0	1	0.5	0	0.5	0	0.5	0.5	0	10.9
NRCH	Navicula reichardtiana Lange-Bertalot in Lange-Bertalot & Krammer 1989	0	0	0	0	0	0	0	0	0	12.7	0	0	0	0	0	0	0	0	0
NVCC	Navicula viridulacalcis Lange-Bertalot in Rumrich et al. 2000	7.1	0	0	0	0	0	0	0	0	0	0	0	0	0	0	0	0	0	0
NVEN	Navicula veneta Kützing 1844	0.9	0	0	0.7	0	1.5	0.5	0.5	0	0	4	0	0	0.5	0	0	0	0	29.3
PTLA	Planothidium lanceolatum (Brébisson ex Kützing) Round & Bukhtiyarova 1996 sensu lato	2.4	0	0.5	0	0	0	13.9	6.1	3	0	0	0	1	0	0	0	0	0	0
RABB	Rhoicosphenia abbreviata (Agardh) Lange-Bertalot 1980	0	0	0	0	0	0	23.4	2	11.6	0	0	0	0	0.5	0	0	0	0	0
	* Lavoie, I.; Hamilton, P.B.; Campeau, S.; Grenier, M.; Dillon, P.J. Guide d'identification des diatomées des rivières de l’est du Canada. 2008
	** very similar to NPAD
